# Supplementary material
Source: PubMed Central journal article supplement (PMC3121347)

## Supplementary Figure legends

**S1:** Time courses of GFP synthesis reaction with the IVTT used in this study. (A) Time courses of the reaction at 37°C with 0, 0.05, 0.1, 0.2, 0.4, 0.6, and 1 nM DNA encoding GFP. (B) Relationship between rate of the fluorescence increase (correlated with the GFP synthesis rate) and DNA concentration at indicated time points. A linear relationship was seen regardless of the time point. GFP synthesis was carried out using the PCR product amplified using pET-GFPuv5 (34) as a template and T7F and T7R primers. PCR was carried out essentially as described for GAL and GUS.

**S2:** Time courses of (A) GAL, (B) GAL-snap, (C) GUS, and (D) GUS-snap synthesis reactions with three different DNA concentrations (0.3, 0.1, 0.03 nM). Fluorescence signals began to be seen earlier with higher DNA concentrations. While GAL and GAL-snap showed nearly identical time courses, the difference between GUS and GUS-snap was not negligible. The difference may result in up to 40-fold higher  $k_2$  or 6.3 ( $= 40^{0.5}$ )-fold higher  $k_1$  with GUS compared to GUS-snap. Below, we describe the mathematical basis of these conclusions.

Assuming that GUS synthesis reaction is a fourth-order reaction as described in eq. 4, and defining the time required for the fluorescence signal to reach a value of  $F_{\text{threshold}}$  as  $\tau$ , the relationship between  $[DNA]$  and  $\tau$  is written as:

$$\text{Log}(\tau) = -\frac{\text{Log}(A/F_{\text{threshold}})}{12} - \frac{4}{12}\text{Log}([DNA])$$

where  $A$  is the product of rate constants (see eq. 4). This equation indicates that  $\text{Log}(\tau)$  and  $\text{Log}[DNA]$  have a linear relationship with a slope of  $-1/3$ , which we indeed saw with both GUS and GUS-snap. The plot in (E) shows the relationship between  $\text{Log}(\tau)$  and  $\text{Log}[DNA]$  with  $F_{\text{threshold}} = 0.1$ , and the line shows the fit with a slope of  $-1/3$ . The difference in GUS and GUS-snap is the intercept, which was estimated to be 0.13. Thus, the difference between GUS and GUS-snap is only in  $A$ , and  $A$  is different

by  $10^{0.13 \times 12} \approx 40$ -fold. As  $A = \frac{k_{\text{cat}}k_2k_1^2k_{t2}^4k_{t1}^4}{2 \cdot 2 \cdot 5 \cdot 2 \cdot 2 \cdot 5 \cdot 11 \cdot 12}$ , the difference in  $A$  may be due to  $k_2$  or  $k_1$ , but

when assuming that these are not affected, it results in up to 40-fold higher  $k_2$  or 6.3 ( $= 40^{0.5}$ )-fold higher  $k_1$ .

**S3:** Kinetic analyses of GAL, GAL-snap, GUS, and GUS-snap. Reaction velocity was measured with different substrate concentrations. By fitting the data to the Michaelis-Menten equation, we obtained  $V_{\text{max}}$  of 0.028, 0.020, 0.086, and 0.077 ( $\text{min}^{-1}$ ) and  $K_M$  of 16.4, 15.7, 8.4, and 5.8  $\mu\text{M}$  for GAL, GAL-snap, GUS, and GUS-snap, respectively. To determine the enzymatic rate constants, four enzymes (GAL, GUS, GAL-snap, and GUS-snap) were overproduced using *E. coli* BL21 (DE3) strain and purified by immobilized metal affinity and size exclusion chromatography. Purity was confirmed by SDS-PAGE. Enzyme activity was measured in 70S buffer containing 0.1% BSA and TG-bgal or TG-GlcU at 37°C.

**S4:** Oligomerization state of GAL-snap and GUS-snap determined by size exclusion chromatography. (A) Analysis of molecular weight standard (purchased from BioRad). Correlation between molecular weight and elution volume of thyroglobulin (670 kDa), bovine  $\gamma$ -globulin (158 kDa), chicken ovalbumin (44 kDa), and equine myoglobin (17 kDa). Detection was performed with excitation and emission wavelengths of 275 and 330 nm, respectively. (B) Estimated and theoretical molecular weights of monomer, dimer, and tetramer of GAL-snap and GUS-snap. (C) Correlation between the concentrations of tetrameric GAL-snap and GUS-snap labeled with Alexa Fluor 488, and the peak height obtained by size exclusion chromatography.

**S5:** RNase treatment of *in vitro* synthesized GAL-snap and GUS-snap showed that molecules

appearing at the void volume ( $V_0$ ) were the ribosome-nascent chain complex. Chromatograms of (A,B) GAL-snap and (C,D) GUS-snap detected by (A,C) fluorescence of Alexa Fluor 488 or (B,D) absorbance at 260 nm before and after adding RNase (10 units/mL), and incubated at 37°C for 30 min.

#### Reference

34. Ito, Y., Suzuki, M., and Husimi, Y. (1999) *Biochem. Biophys. Res. Commun.* **264**, 556-560

Figure S1

A

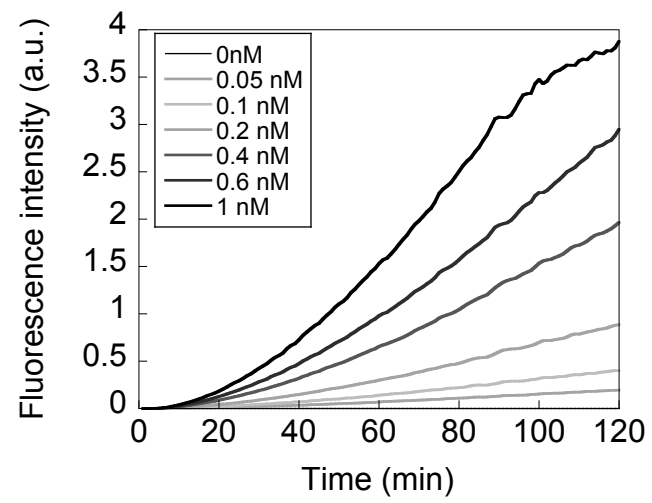

B

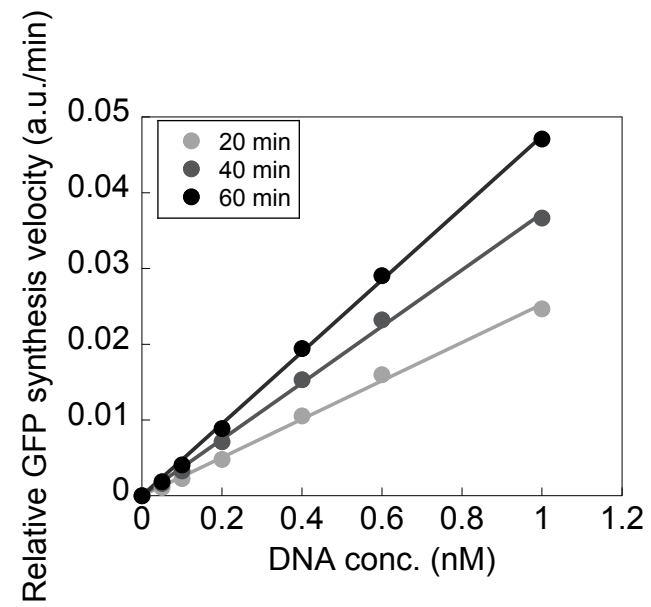

Figure S2

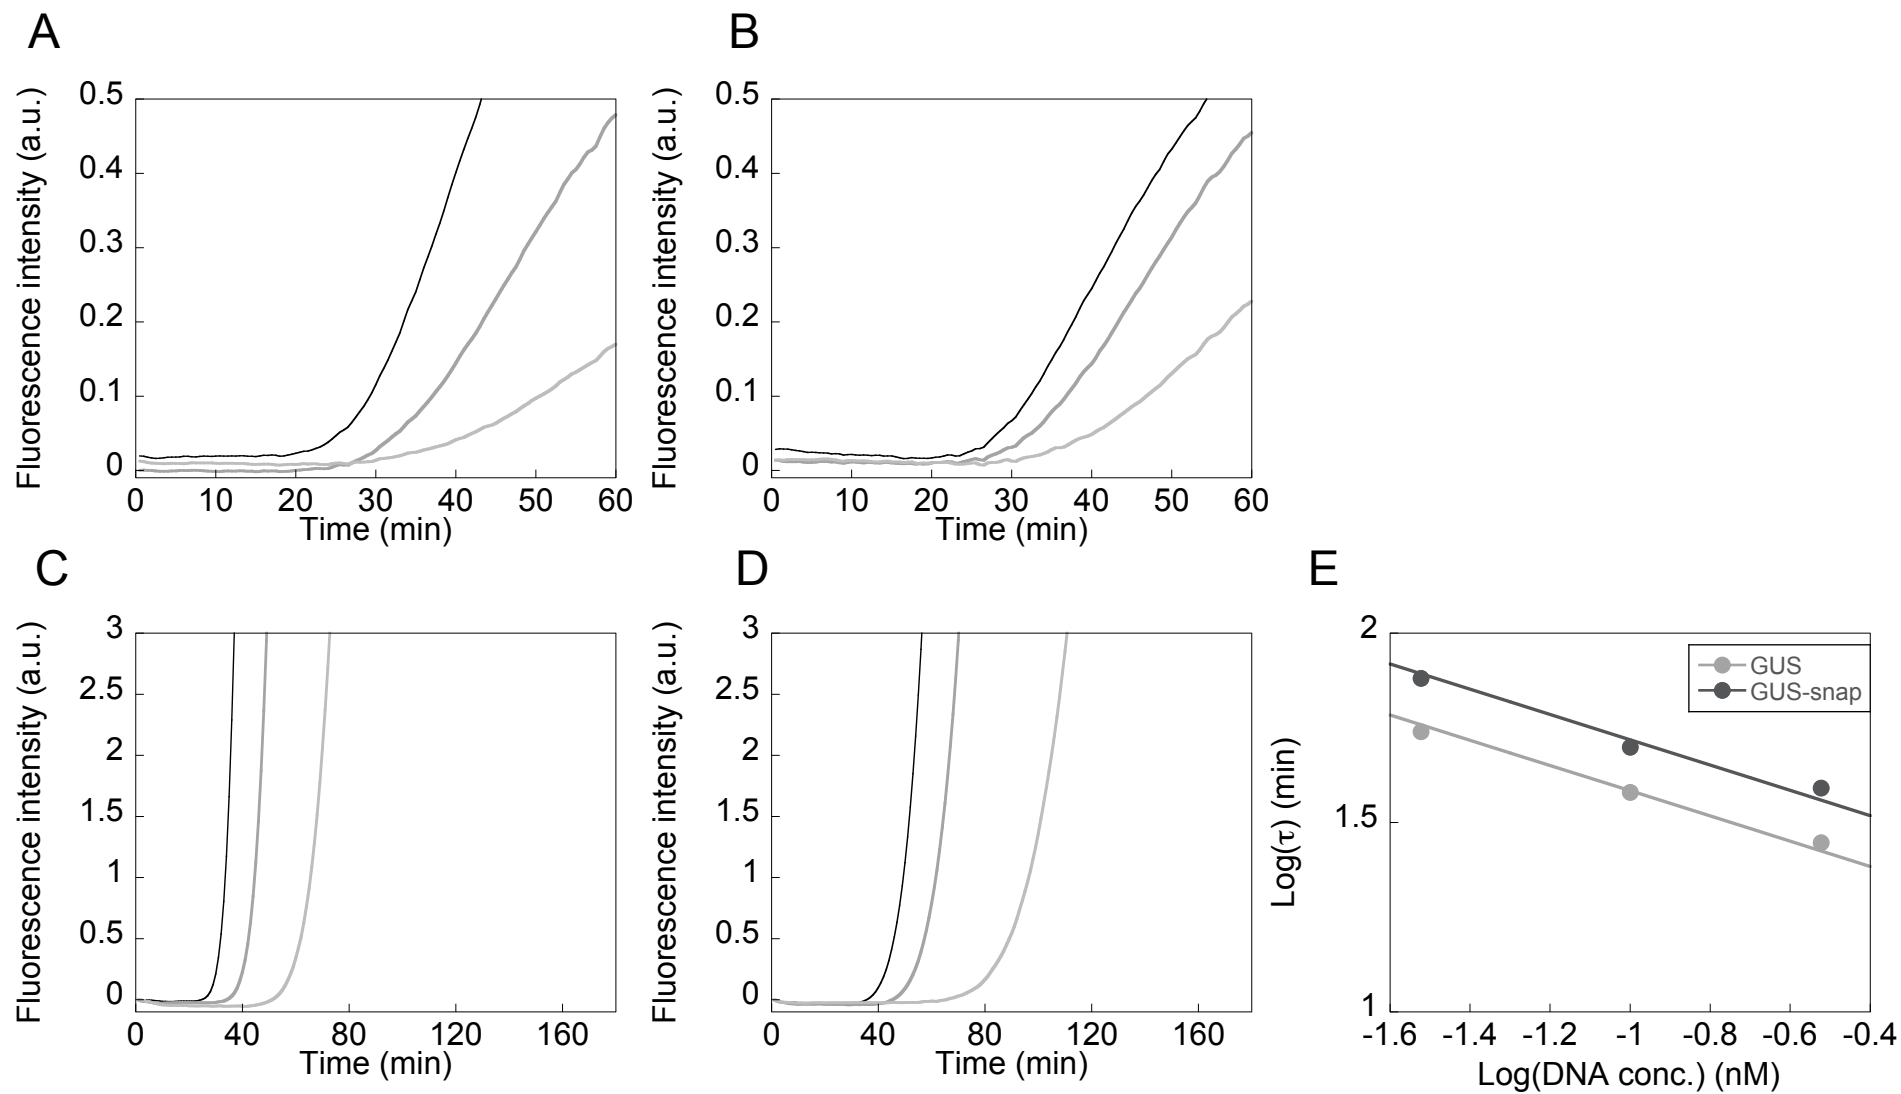

Figure S3

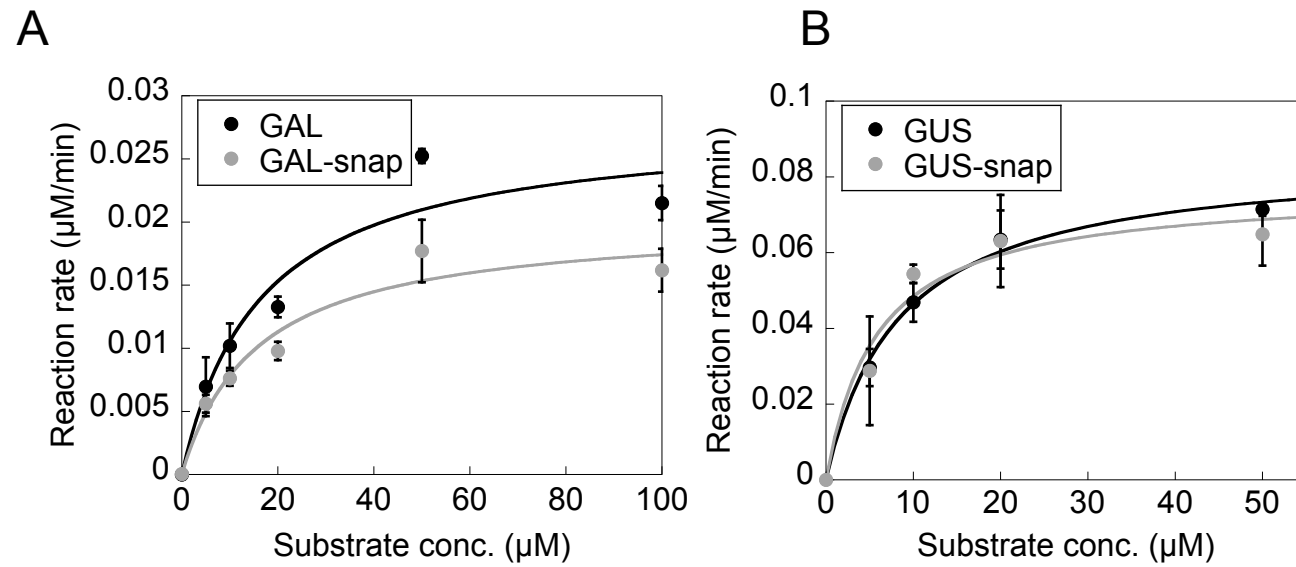

Figure S4

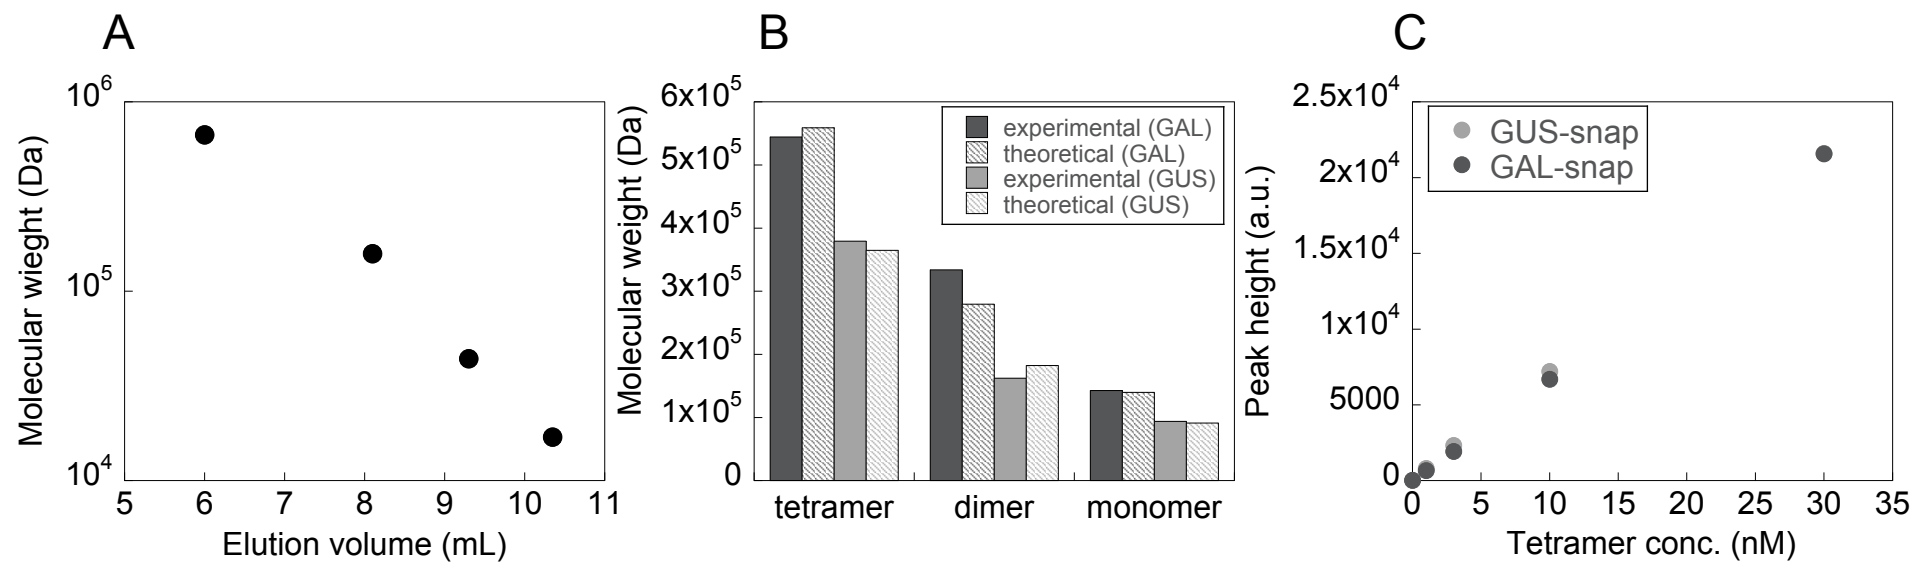

Figure S5

A

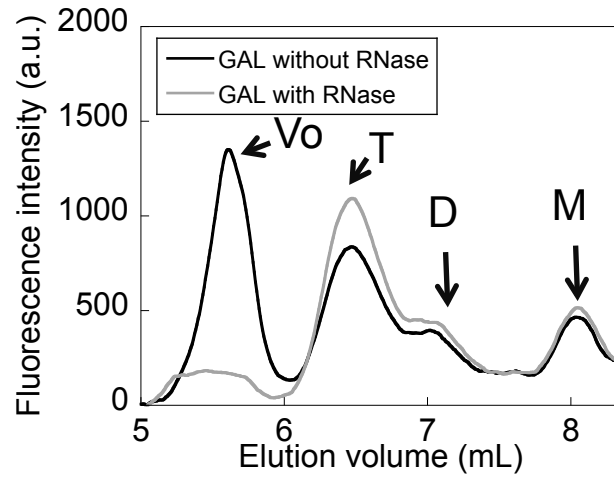

C

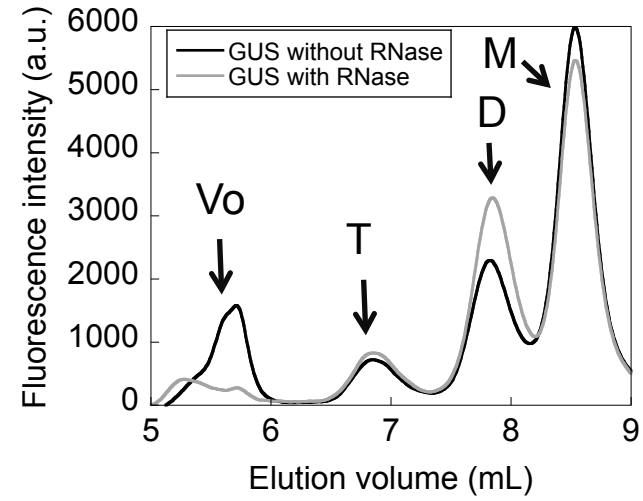

B

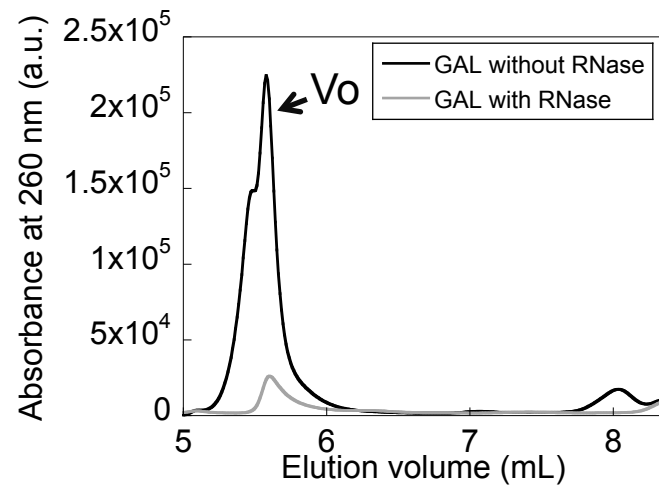

D

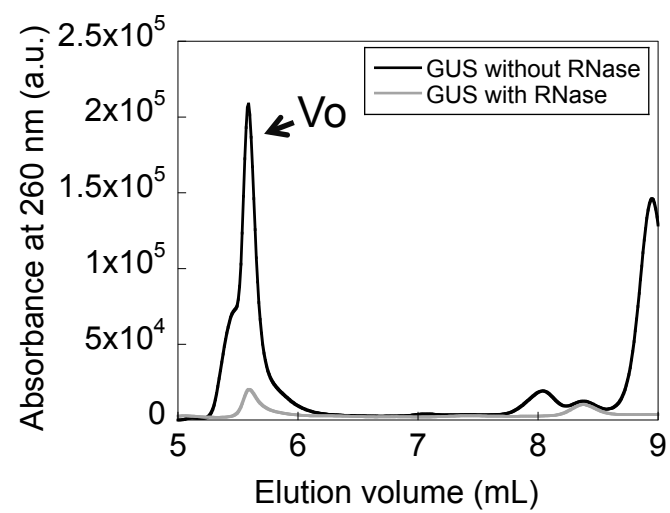

Supplement: supp_M111.240168_jbc.M111.240168-1.pdf [file supp_M111.240168_jbc.M111.240168-1.pdf]
